# Supplementary material for: Flame-Retarded and Heat-Resistant PP Compounds for Halogen-Free Low-Smoke Cable Protection Pipes (HFLS Conduits)
Source: MDPI journal article supplement (doi:10.3390/polym16091298), 2024-05-06
Supplement: s1 [file s1]

## SUPPLEMENTARY INFORMATION

**Table S1:** Thermal properties of developed FR compounds and Industrial scale MBs. Comparison to reference PP and PP carrier.

| Samples                              | TGA            |               |               |          | DSC         |            |           |              |
|--------------------------------------|----------------|---------------|---------------|----------|-------------|------------|-----------|--------------|
|                                      | $T_{5\%}$ (°C) | $T_{d1}$ (°C) | $T_{d2}$ (°C) | R (%)    | OOT (°C)    | $T_c$ (°C) | $X_c$ (%) | $T_m^2$ (°C) |
| Lab-Scale Compounds                  |                |               |               |          |             |            |           |              |
| PP                                   | 391.7±0.0      | 433.5±1.2     | <i>n.d.</i>   | 1.1±0.1  | 245.7±0.4   | 115.7±0.9  | 32.2±2.9  | 167.0±0.2    |
| FR1                                  | 317.4±3.0      | 447.8±3.1     | <i>n.d.</i>   | 2.5±0.3  | 255.0±3.4   | 108.8±3.1  | 36.8±0.5  | 170.6±2.0    |
| FR2                                  | 351.7±6.7      | 431.3±7.7     | <i>n.d.</i>   | 1.6±0.4  | 248.4±0.7   | 115.3±1.6  | 32.2±1.7  | 167.5±0.5    |
| Industrial Scale Masterbatches (MBs) |                |               |               |          |             |            |           |              |
| PP carrier                           | 410.1±2.3      | 456.3±1.9     | <i>n.d.</i>   | 0.0±0.0  | <i>n.d.</i> | 106.5±0.2  | 39.6±2.8  | 168.0±0.0    |
| MB1                                  | 307.1±1.5      | 378.4±8.4     | 457.6±5.1     | 10.3±0.4 | <i>n.d.</i> | 104.7±1.9  | 39.3±5.9  | 160.5±2.1    |
| MB2                                  | 314.6±0.1      | 328.0±0.2     | 475.1±2.9     | 29.5±0.6 | <i>n.d.</i> | 118.0±3.8  | 42.8±12.3 | 163.6±0.1    |

**Table S2:** Determined mechanical properties of the FR compounds prior to ageing.

| FR Compounds | Tensile Tests         |                          |           | Impact Tests                  |         |
|--------------|-----------------------|--------------------------|-----------|-------------------------------|---------|
|              | $\sigma_{\max}$ (MPa) | $\varepsilon_{\max}$ (%) | $E$ (GPa) | $a_{iu}$ (kJ/m <sup>2</sup> ) | RSD (%) |
| PP           | 25.1±0.6              | 75.9±11.6                | 1.10±0.01 | 59.3±3.3                      | 5.6     |
| FR1          | 24.4±0.4              | 47.6±4.3                 | 1.30±0.01 | 66.2±14.1                     | 21.3    |
| FR2          | 28.2±1.0              | 42.9±8.4                 | 1.20±0.01 | 57.9±8.1                      | 14.0    |

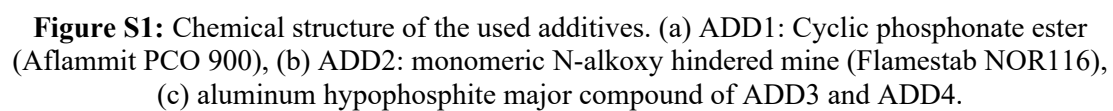

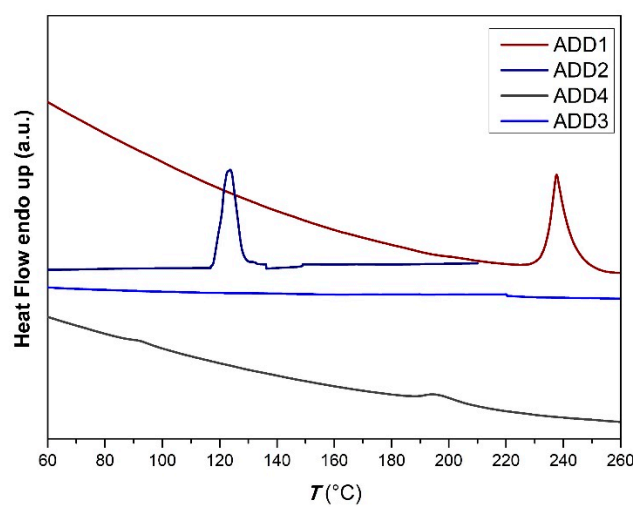

**Figure S2:** 1<sup>st</sup> heating DSC curves of the used additives.

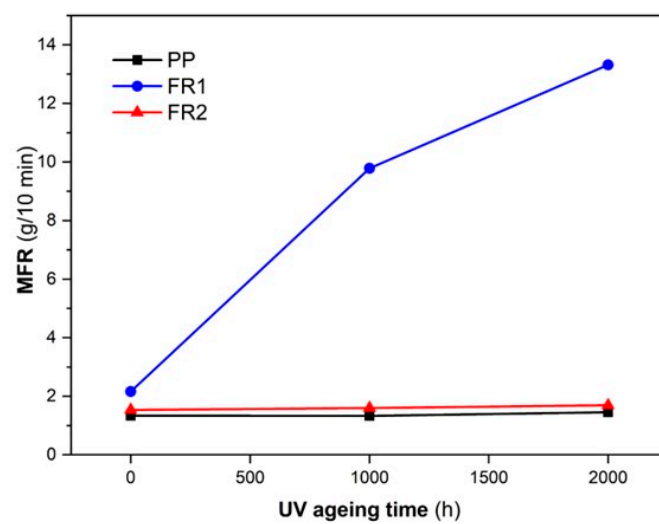

**Figure S3:** MFR of PP reference FR1 and FR2 during UV ageing tests.

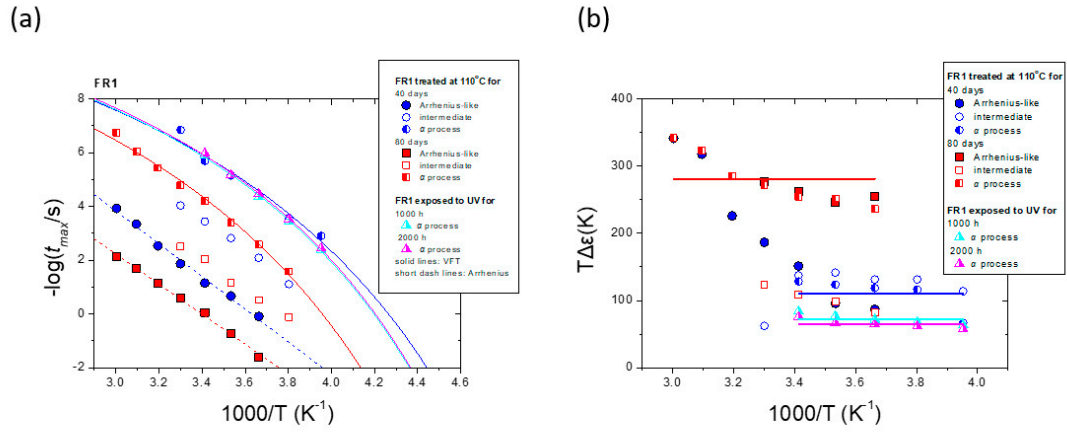

**Figure S4:** (a) Relaxation map for LA (red) and LA in  $P_2O_5$  (blue). Filled circles correspond to  $\alpha$  process, crossed-circles to dc-conductivity and yellow filled squares indicate the  $T_g$  at  $\tau=100$  s. Lines correspond to VFT fits of the experimental data. (b) Normalized Dielectric Strength ( $T\Delta\epsilon$ ) (top) and Parameters  $m$ ,  $mn$  (bottom).

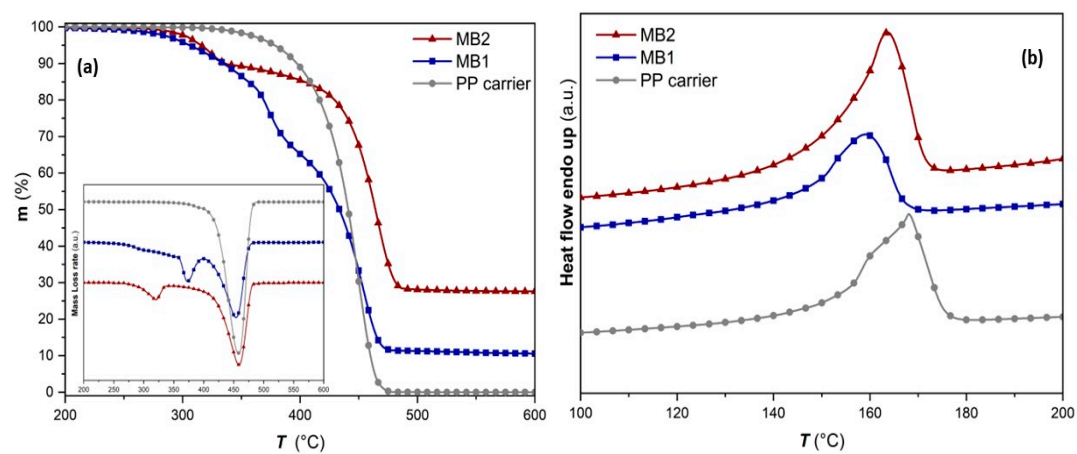

**Figure S5:** (a)TGA and (b) DSC curves of the industrial scale masterbatches MB1, MB2 and the PP carrier.
